# Supplementary material for: Coumarin centered copper(ii) complex with appended-imidazole as cancer chemotherapeutic agents against lung cancer: molecular insight via DFT-based vibrational analysis
Source: Royal Society of Chemistry journal article supplement (doi:10.1039/c7ra05874h), 2017-01-01
Supplement: c7ra05874h1.pdf [file c7ra05874h1.pdf]

## Supplementary Information

### **Coumarin centered Copper(II) complex with Appended-Imidazole as Cancer Chemotherapeutic Agents against Lung Cancer: Molecular insight via DFT-based Vibrational Analysis**

Mohammad Usman,<sup>#a</sup> Mehvash Zaki,<sup>#a</sup> Rais Ahmad Khan,<sup>b</sup> Ali Alsalmeh,<sup>b</sup> Musheer Ahmad,<sup>c</sup> and Sartaj Tabassum<sup>\*a</sup>

<sup>a</sup>Department of Chemistry, Aligarh Muslim University, Aligarh–202002, India.

<sup>b</sup>Department of Chemistry, College of Science, King Saud University, P.O. Box 2455, Riyadh 11451, KSA.

<sup>c</sup>Department of Applied Chemistry, Aligarh Muslim University, Aligarh–202002, India.

*# Both authors contributed equally*

*\*Corresponding author:*

*Aligarh Muslim University, Aligarh, UP–202002, India.*

*Tel.: +91 9358255791*

*E-mail address: tsartaj62@yahoo.com (S. Tabassum)*

**Table S1.** Selected bond lengths (Å) of complex **1**.

| Bond lengths | (Å)       |
|--------------|-----------|
| N1 Cu1       | 1.990(2)  |
| N2 Cu1       | 1.943(2)  |
| N3 Cu1       | 1.949(2)  |
| O1 Cu1       | 1.918(19) |
| N5 O6        | 1.243(3)  |
| N5 O4        | 1.250(3)  |
| N5 O5        | 1.261(3)  |

**Table S2.** Selected bond angles of complex **1**

| Bond Angle | [deg]      |
|------------|------------|
| O6 N5 O4   | 121.0(2)   |
| O6 N5 O5   | 119.1(2)   |
| O4 N5 O5   | 119.9(2)   |
| C19 O1 Cu1 | 127.7(2)   |
| O1 Cu1 N2  | 92.83(9)   |
| O1 Cu1 N3  | 88.58(9)   |
| N2 Cu1 N3  | 171.91(10) |
| O1 Cu1 N1  | 159.69(9)  |
| N2 Cu1 N1  | 83.67(10)  |
| N3 Cu1 N1  | 97.69(10)  |

**Table S3.** Hydrogen bond metrics for **1**

| $D - H \cdots A$     | $H \cdots A$ | $D \cdots A$ | $\angle D - H \cdots A$ | Symmetry operation     |
|----------------------|--------------|--------------|-------------------------|------------------------|
| N(4) --H(4) ..O(5)   | 2.02         | 2.86(18)     | 167                     | $1/2-x, 1/2+y, 1/2-z$  |
| C(5) --H(5) ..O(5)   | 2.52         | 3.40(2)      | 158                     | $3/2-x, -1/2+y, 1/2-z$ |
| C(7) --H(7) ..O(3)   | 2.47         | 3.38(2)      | 164                     | $1-x, -y, -z$          |
| C(10) --H(10) ..O(3) | 2.45         | 2.78(17)     | 101                     |                        |
| C(10) --H(10) ..O(3) | 2.49         | 3.41(2)      | 173                     | $1-x, -y, -z$          |
| C(15) --H(15) ..O(4) | 2.40         | 3.29(2)      | 161                     | $-x, 1-y, -z$          |
| C(23) --H(23) ..O(5) | 2.31         | 3.16(2)      | 153                     |                        |
| C(23) --H(23) ..O(6) | 2.55         | 3.11(19)     | 120                     | $1/2-x, 1/2+y, 1/2-z$  |

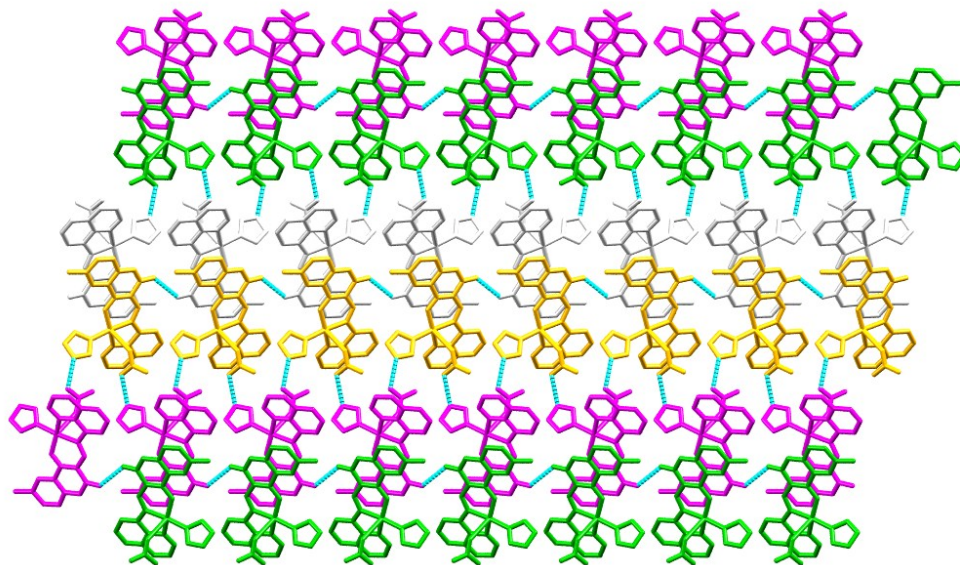

**Fig. S1.** Representation of 2D view along crystallographic a-axis of complex 1.

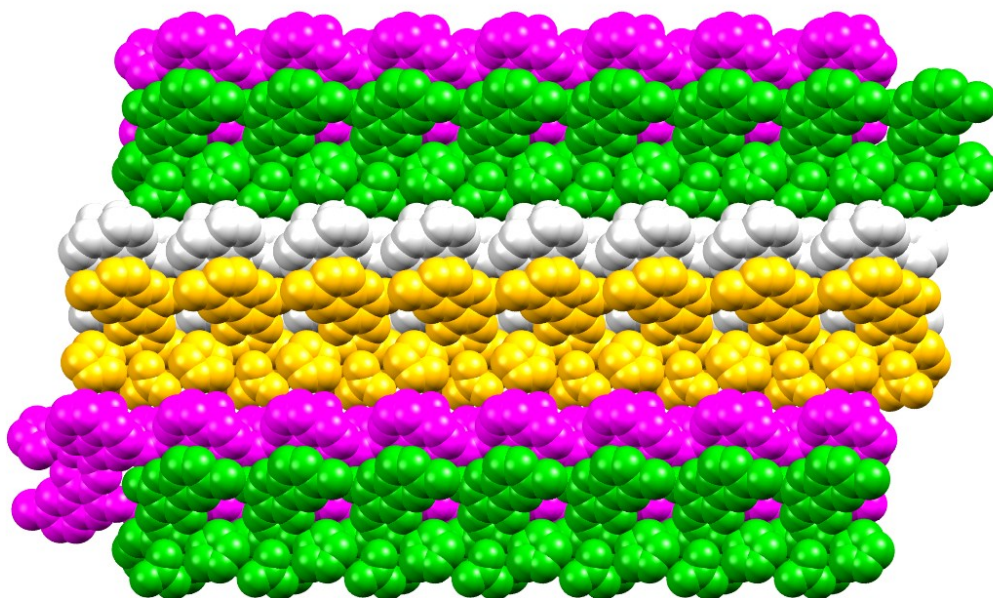

**Fig. S2.** 2D view in spacefill model of complex 1.

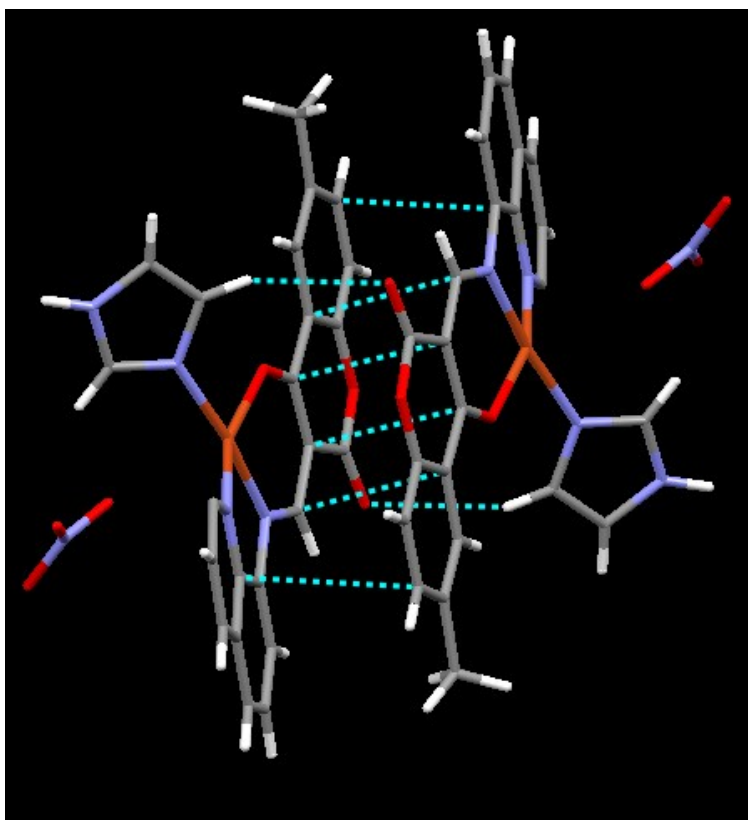

**Fig. S3.** Non-covalent ( $\text{CH}\cdots\pi$ ,  $\pi\cdots\pi$  and Hydrogen bonding) interactions of complex **1**.

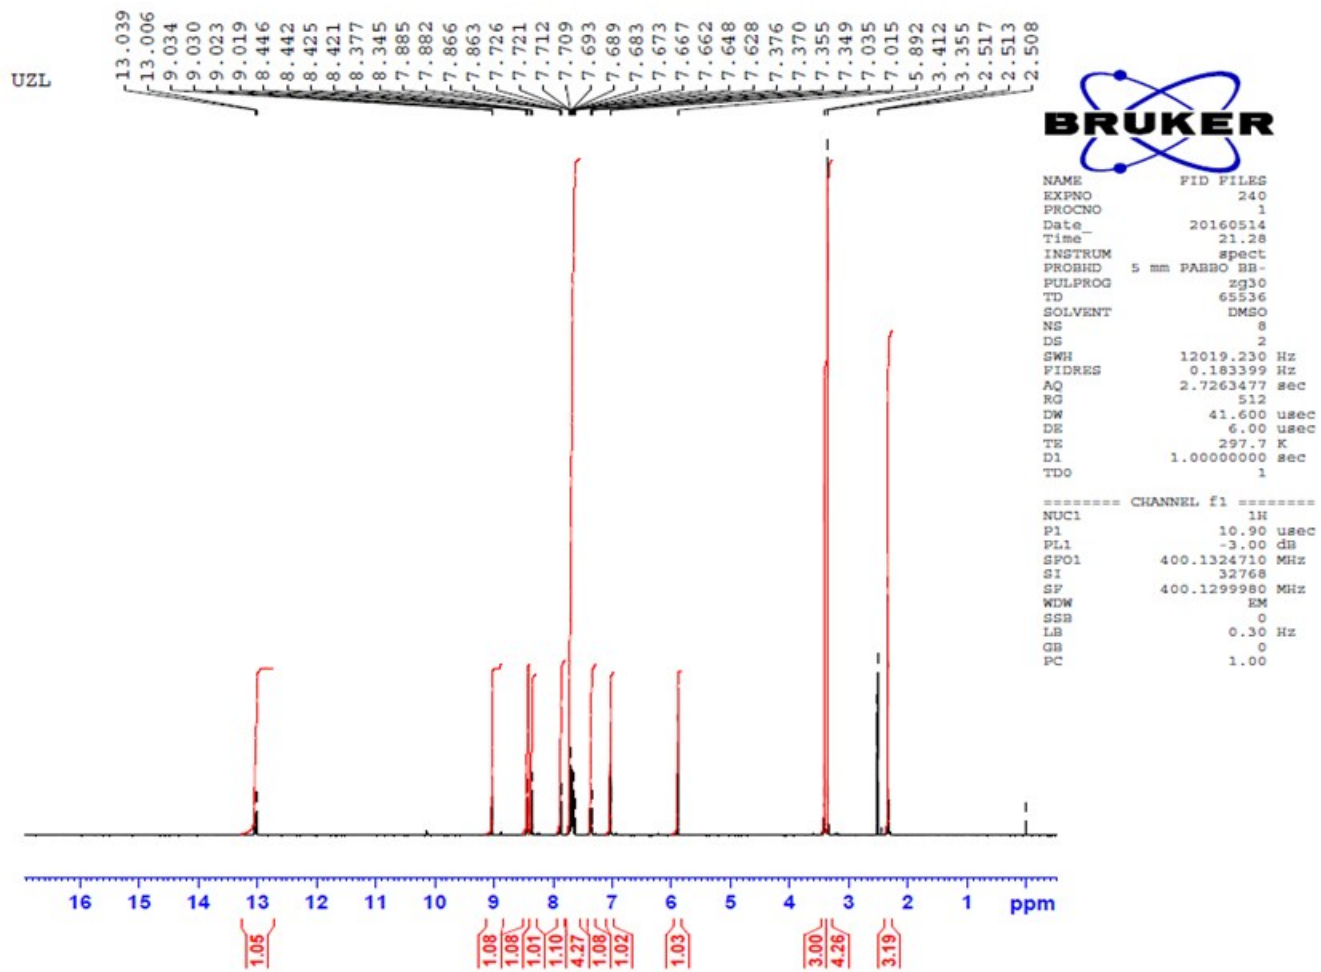

Fig. S4. <sup>1</sup>H NMR spectrum of ligand (HL).

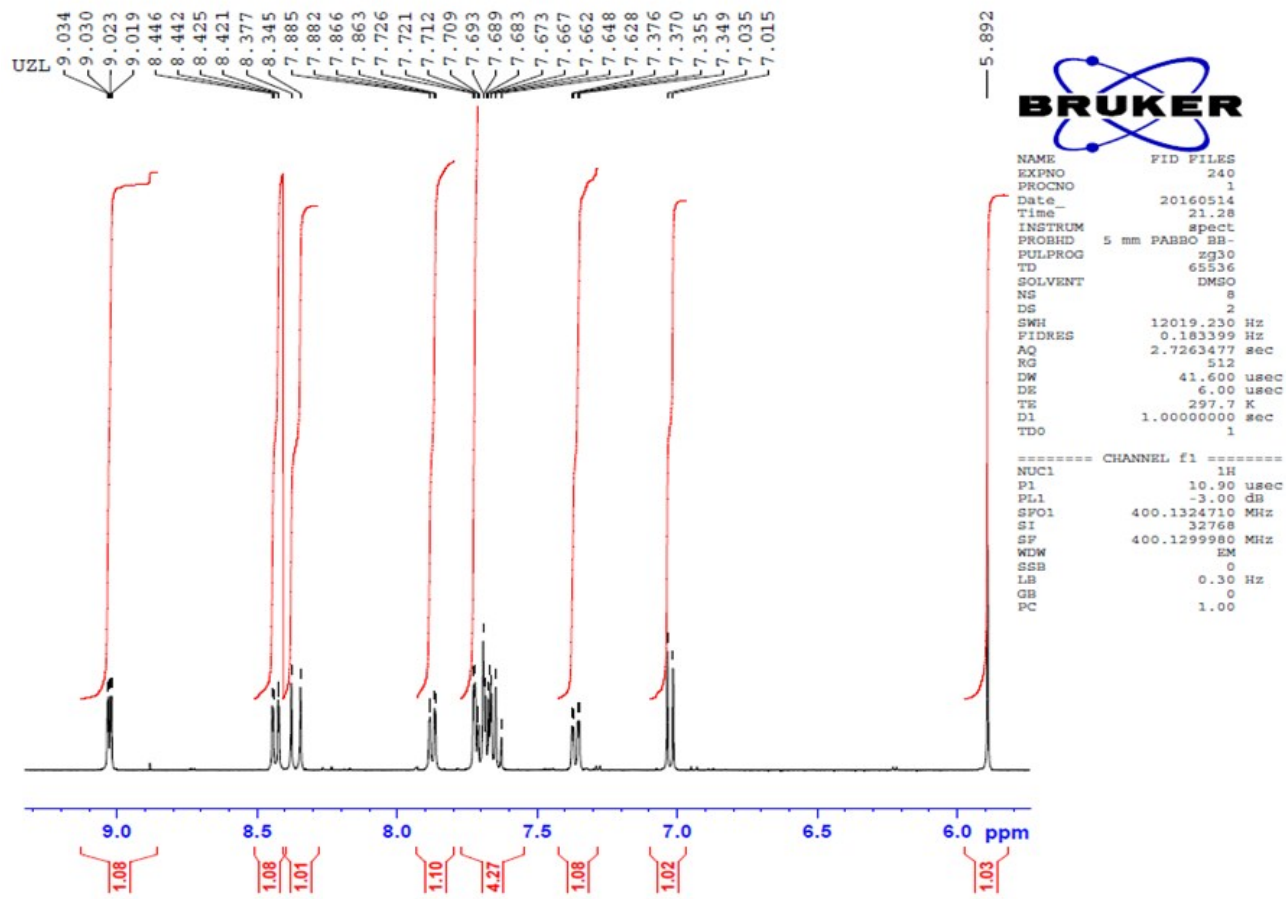

Fig. S5. <sup>1</sup>H NMR spectrum of ligand (HL).

UZL

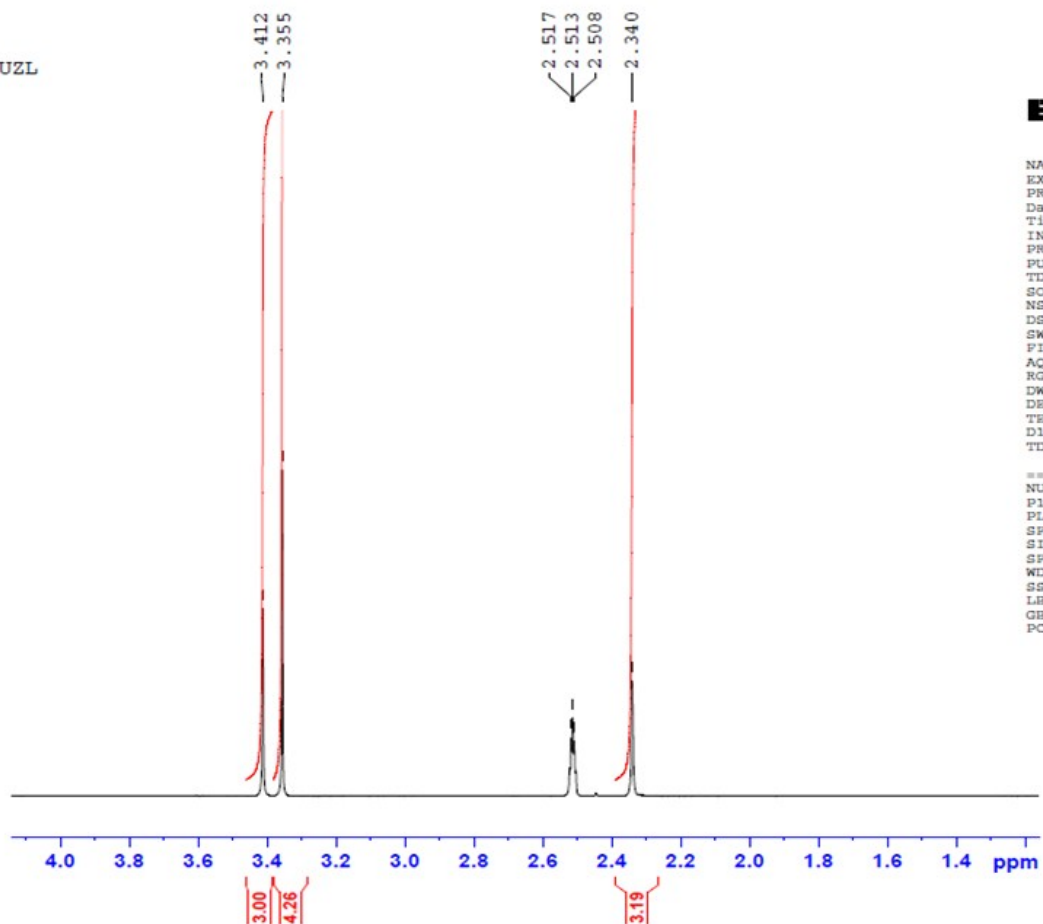

**BRUKER**

```
NAME          FID FILES
EXPNO         240
PROCNO        1
Date_         20160514
Time_         21.28
INSTRUM       spect
PROBHD        5 mm PABBO BB-
PULPROG       zg30
TD            65536
SOLVENT       DMSO
NS            8
DS            2
SWH           12019.230 Hz
FIDRES        0.183399 Hz
AQ            2.7263477 sec
RG            512
DW            41.600 usec
DE            6.00 usec
TE            297.7 K
D1            1.00000000 sec
TDO           1

===== CHANNEL f1 =====
NUC1          1H
P1            10.90 usec
PL1           -3.00 dB
SFO1          400.1324710 MHz
SI            32768
SF            400.1299980 MHz
WDW           EM
SSB           0
LB            0.30 Hz
GB            0
PC            1.00
```

Fig. S6. <sup>1</sup>H NMR spectrum of ligand (HL).

UZL

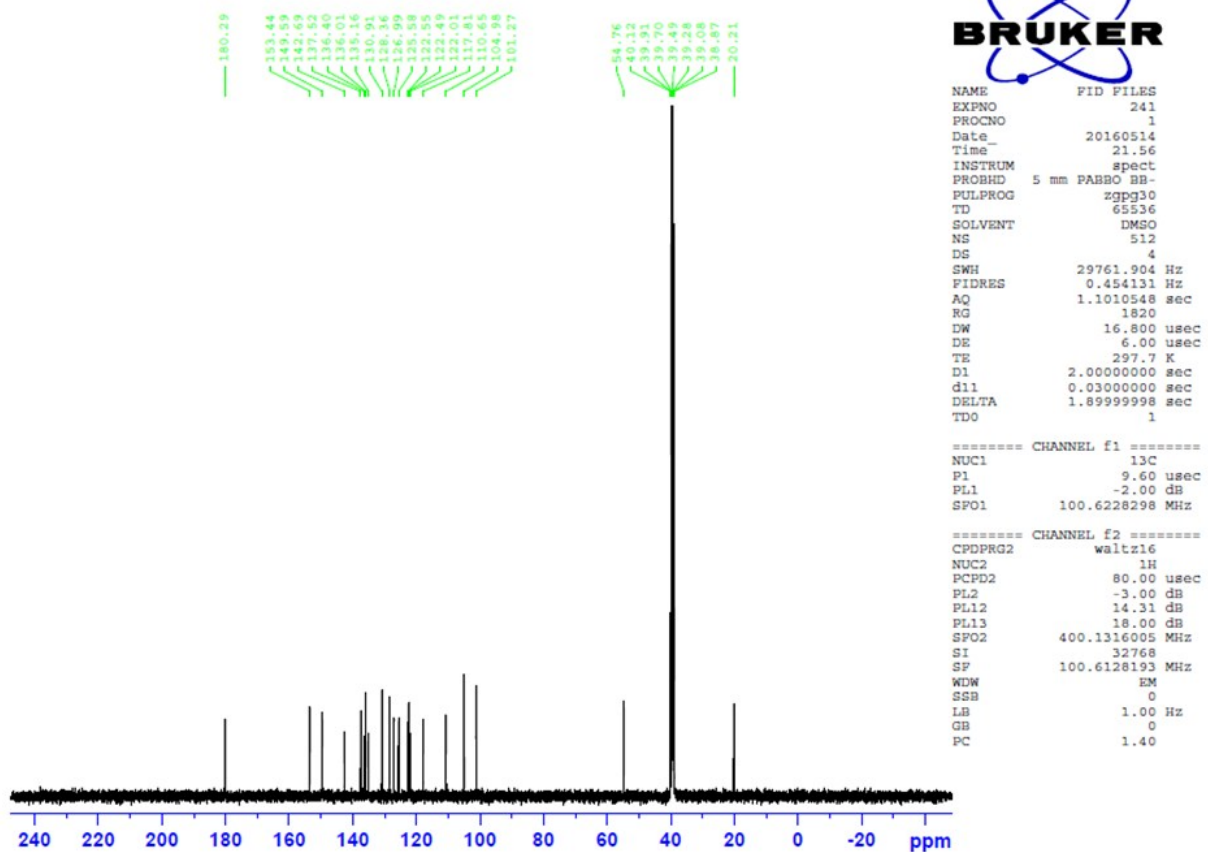

Fig. S7.  $^{13}\text{C}$  NMR spectrum of ligand (HL).



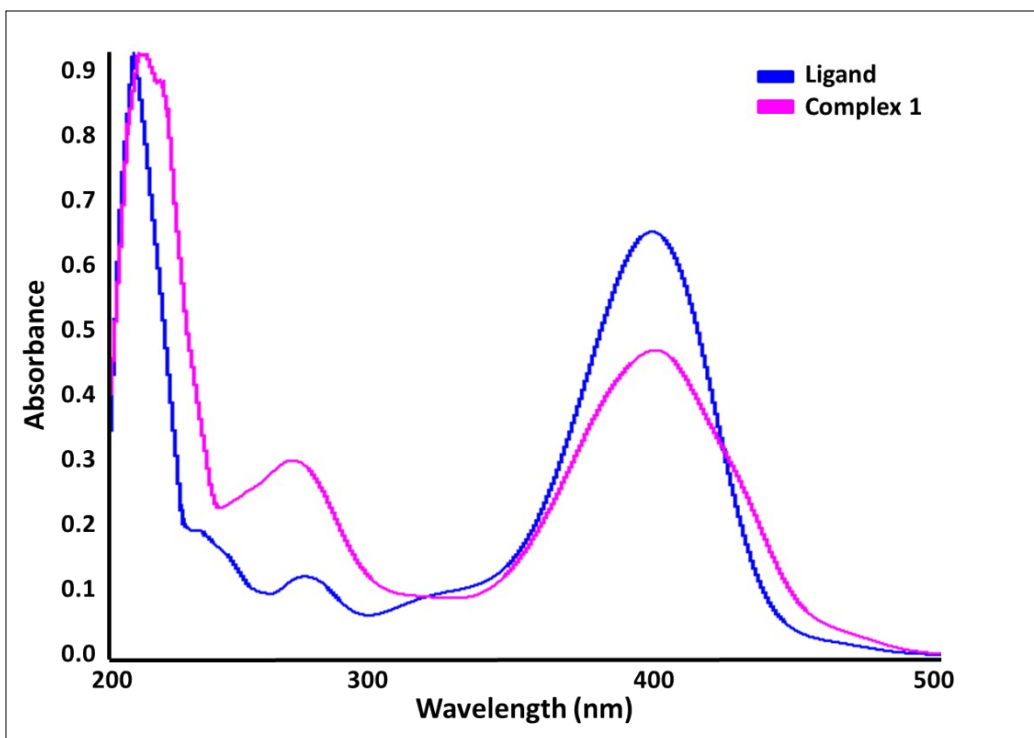

Fig. S8. UV-vis spectra in MeOH ( $1 \times 10^{-4}$ ).

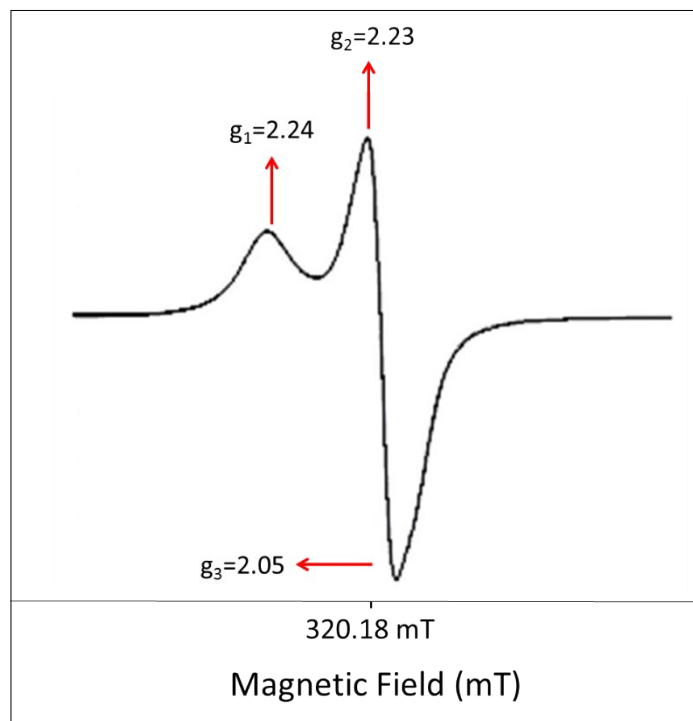

Fig. S9. X-band Polycrystalline EPR spectrum of complex 1 at 77K.

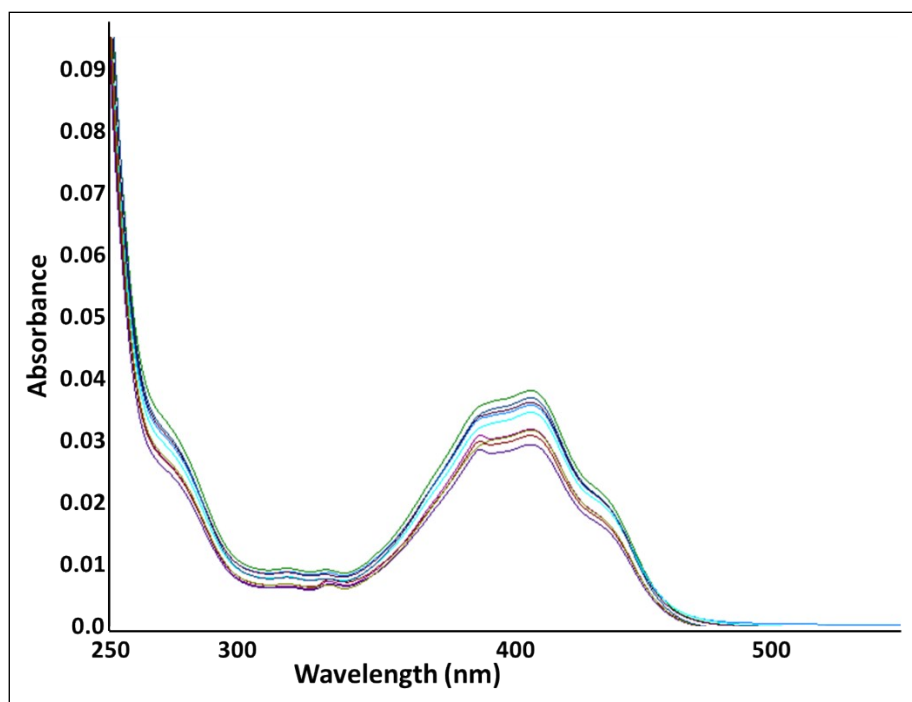

**Fig. S10.** Time-dependent stability studies of complex **1** in Tris-HCl buffer under physiological conditions (pH = 7.3 & T = 310 K) monitored by UV-vis absorption spectra.

**(a)**

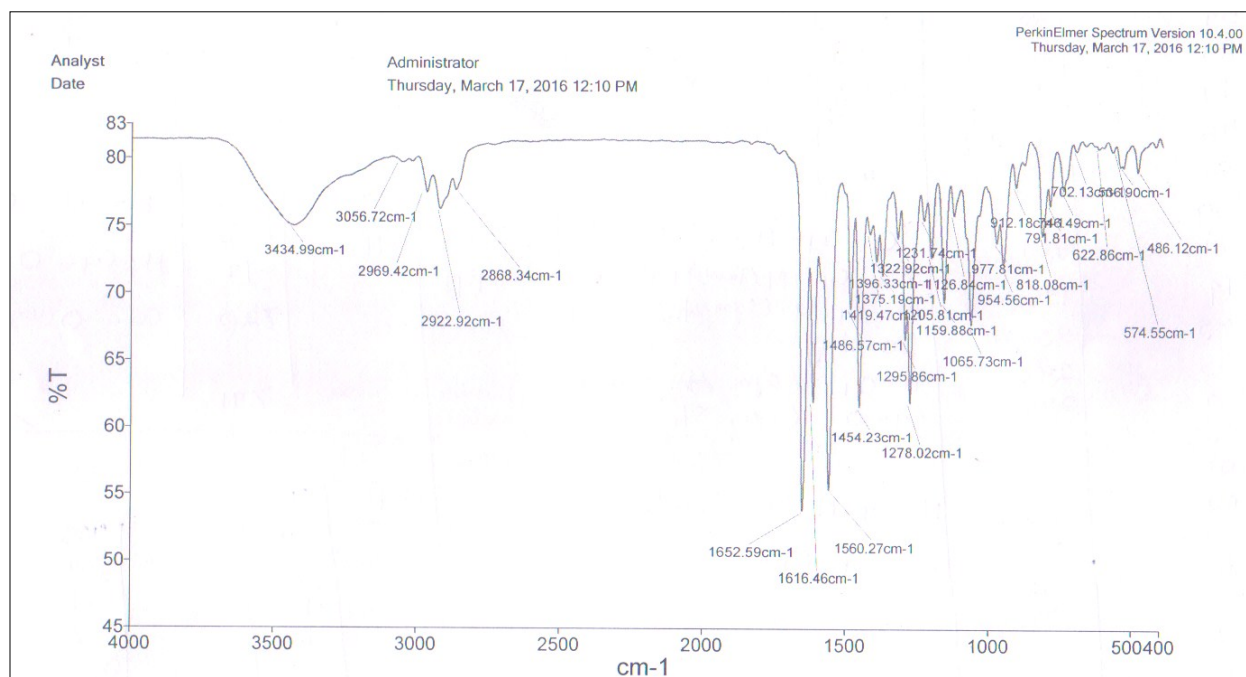

(b)

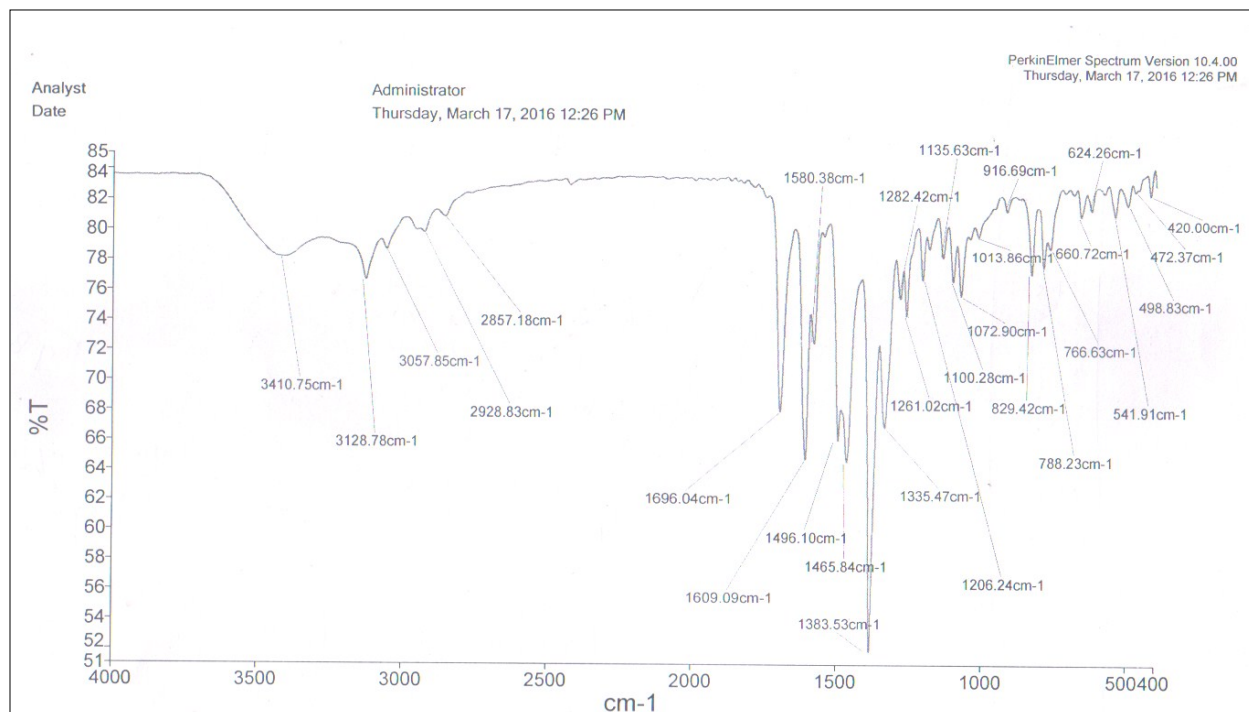

(c)

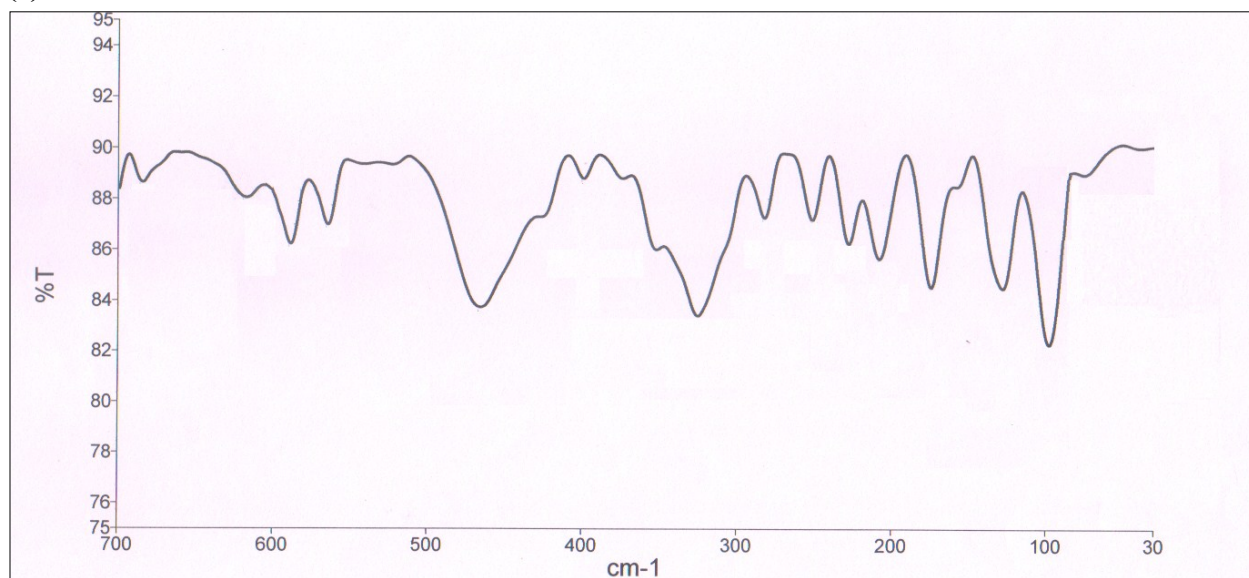

**Fig. S11.** (a) Experimental FTIR spectra of Ligand (b) complex 1 (c) Experimental Far-IR spectra of complex 1.

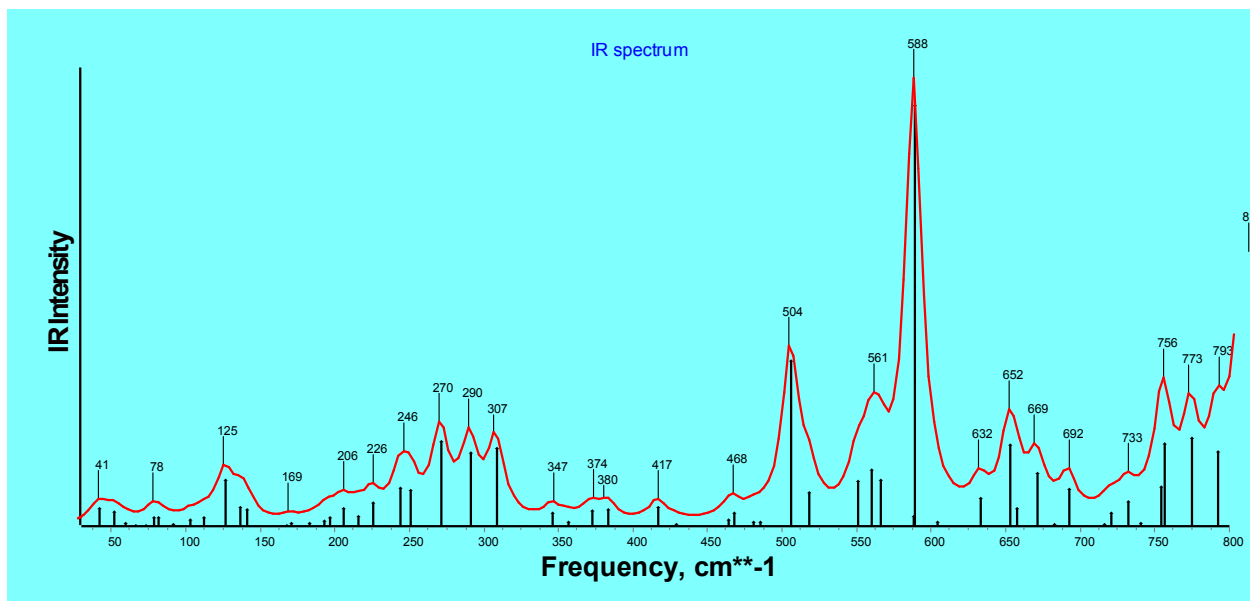

Fig. S12. B3LYP/DFT simulated IR spectrum of complex 1.

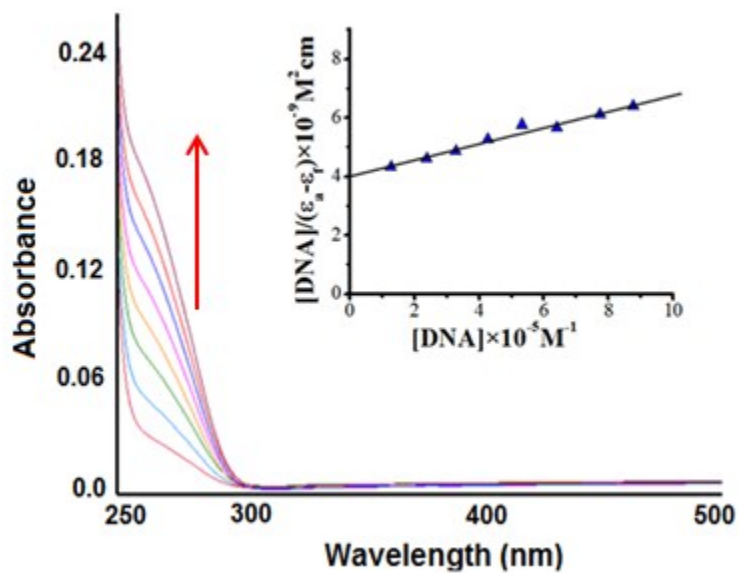

Fig. S13. Absorption spectra for ligand L (▲) interaction with CT DNA under the same condition for complex

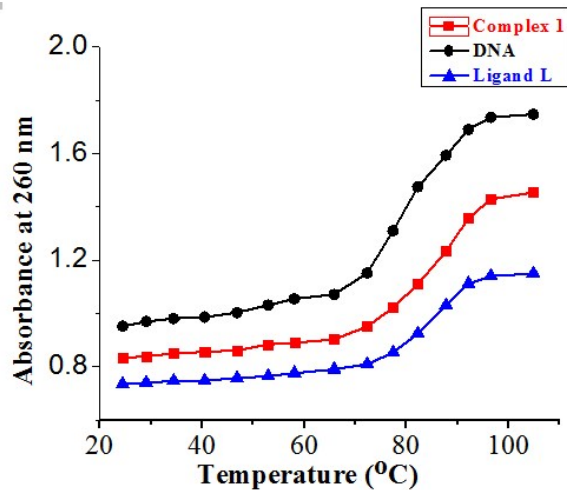

Fig. S14. Thermal melting profile for ligand L ▲ and complex 1 ■.

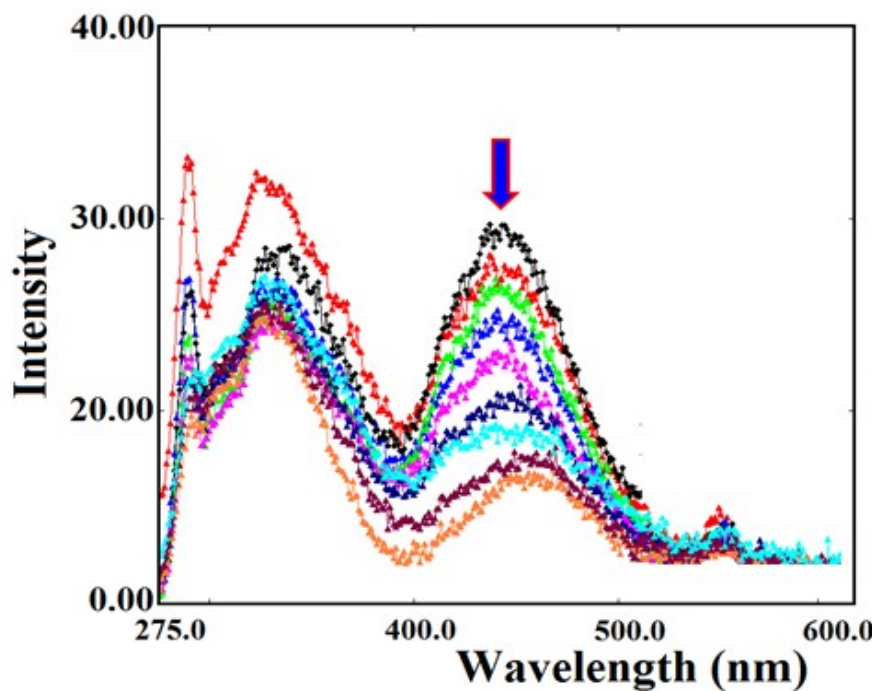

Fig. S15. Emission spectra of ligand (L) in Tris-HCl buffer (pH 7.2) with and without of CT DNA at room temperature. The arrow shows a change in intensity with increasing concentration of DNA.

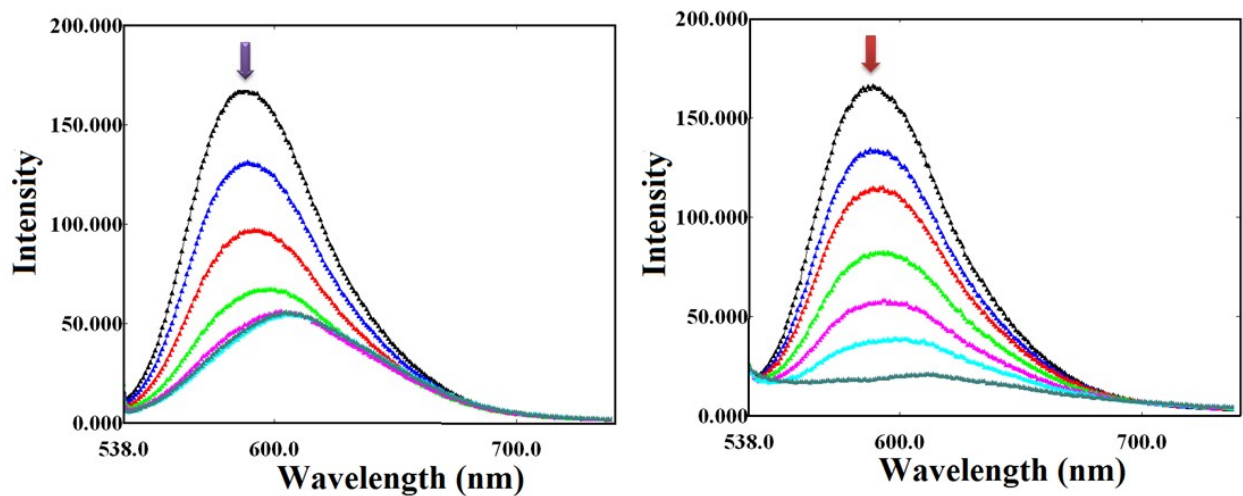

**Fig. S16.** Emission quenching spectra of CT DNA bound ethidium bromide in the presence of ligand **L** (left) and complex **1** (right) in buffer 5 mM Tris-HCl/50 mM NaCl, pH = 7.2 at 25 °C. Arrow shows change in intensity with increasing concentration of ligand **L**/complex **1**.

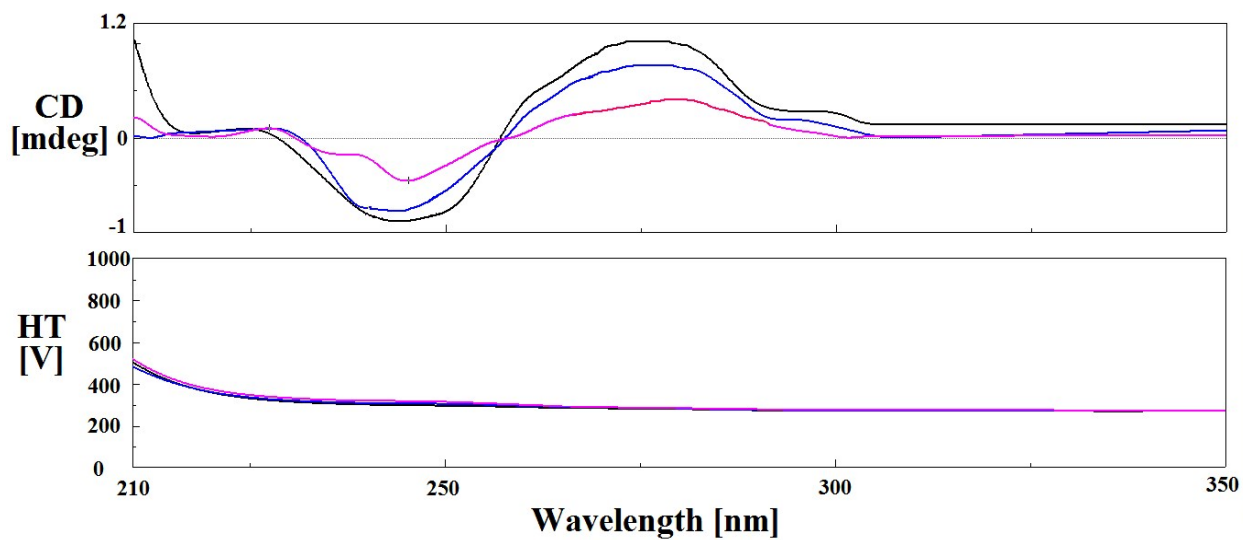

**Fig. S17.** CD spectra of CT DNA alone in black line (—) and with ligand **L** in blue line (—) Complex **1** in red line (—) in 5 mM Tris-HCl/50 mM NaCl buffer at 25 °C. [Ligand/Complex] = 35  $\mu$ M, [DNA] = 140  $\mu$ M.

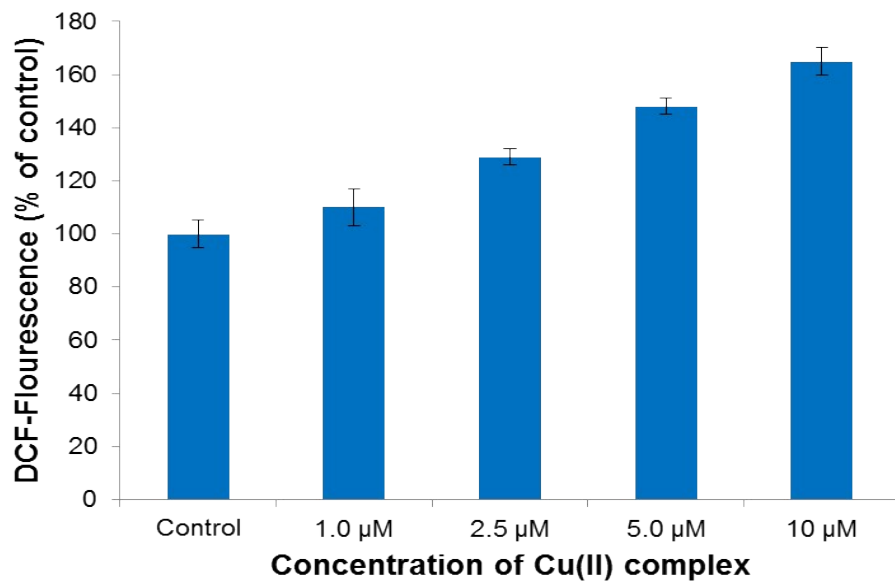

**Fig. S18.** ROS generation in A549 cells following the exposure of 20  $\mu\text{M}$  for 24 h.

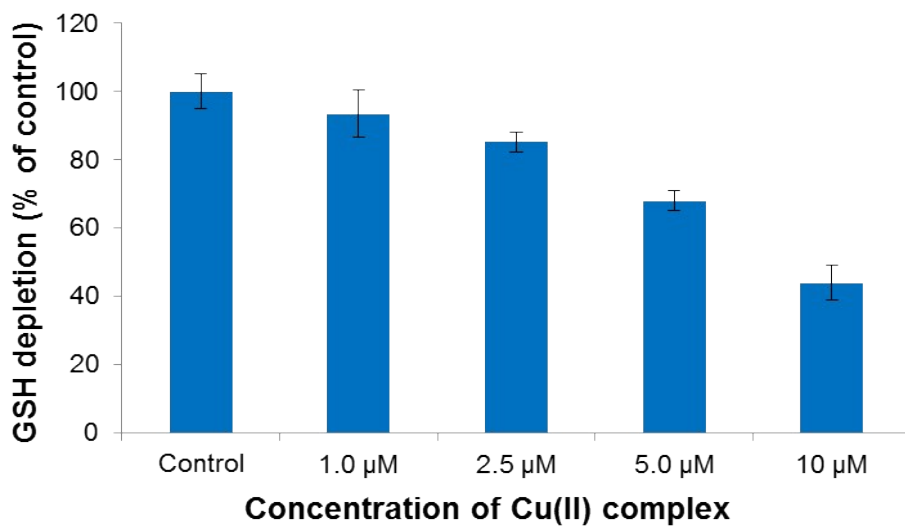

**Fig. S19.** Glutathione depletion in A549 cells exposed to complex 1 for 24 h.

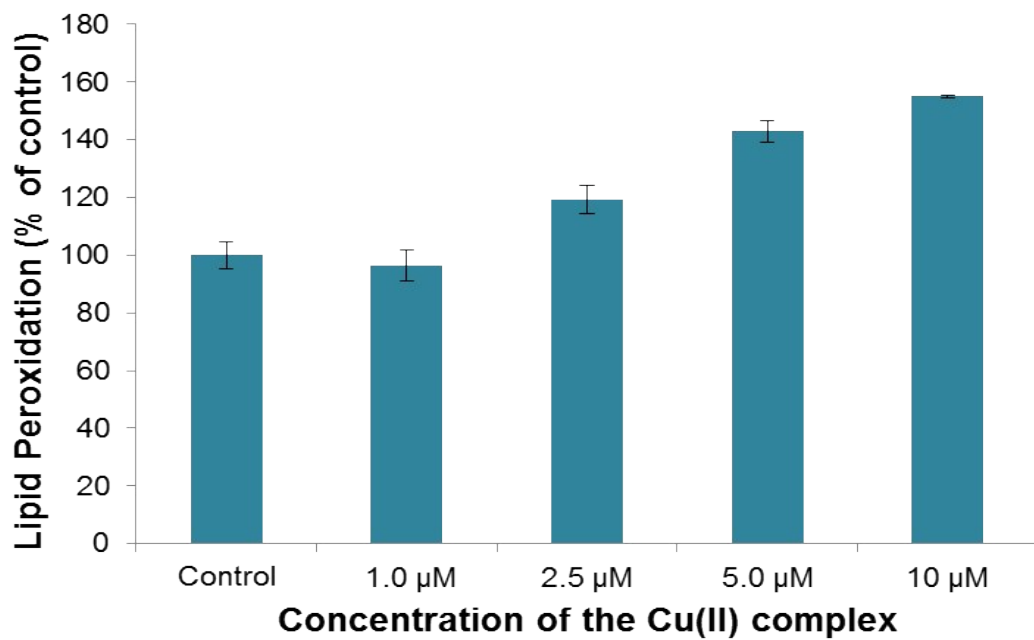

**Fig. S20.** Lipid peroxidation level in A549 cells exposed to complex 1 for 24 h.
